# Supplementary material
Source: publisher figshare collection journal article supplement (https://gsapubs.figshare.com/ndownloader/files/24723857)
Supplement: Supplementary file 1 [file 24723857]

## Sheet: Sheet1
TABLE S1. PYROXENE EPMA DATA COLLECTED AT FIU
IODP No.	Cpx #	SiO2 (wt %)	TiO2	Al2O3	FeO	MgO	MnO	CaO	Na2O	K2O	Cr2O3		Mg#	Msite	Tsite	wo	en	fs
1438E 61R-1-137	1	50.6918	0.586387	2.3514	9.16657	16.3027	0.16294	20.4884	0.242946	0.0068298	0	100	76.0215	1.0065	1.0062	0.407079	0.450748	0.142173
	2	50.6195	0.484798	2.44294	9.45954	15.3669	0.194518	21.1186	0.313223	0	0	100	74.3317	1.0009	1.0087	0.42333	0.428649	0.148021
	4	51.3506	0.273954	2.09309	8.97937	15.7159	0.159642	21.1733	0.245376	0.008869	0	100	75.7281	1.0004	1.0078	0.423022	0.436935	0.140043
	5	51.2013	0.66664	1.78267	8.93516	15.546	0.147812	21.4039	0.316456	0	0	100	75.6189	1.0011	1.0052	0.427974	0.43256	0.139466
	6	51.3228	0.758861	1.76671	8.35739	16.0878	0.121021	21.3027	0.243034	0	0.039679	100	77.4345	1.0019	1.0052	0.424238	0.445838	0.129924
	7	51.3984	0.483841	1.70487	9.35293	15.2315	0.164923	21.3595	0.286132	0.000993512	0.0168897	100	74.3791	0.9991	1.0058	0.428422	0.425135	0.146443
	8	51.2794	0.622291	1.66706	8.70909	15.8058	0.191857	21.4482	0.265418	0	0.0109348	100	76.3885	1.0049	1.0028	0.426902	0.437781	0.135317
	9	50.2982	0.416629	2.68261	9.53951	15.0016	0.165852	21.4809	0.368672	0.0229795	0.0229795	100	73.7073	1.0013	1.0091	0.431314	0.419163	0.149523
	10	51.1588	0.662428	1.67184	8.99601	15.8825	0.149835	21.1918	0.286855	0	0	100	75.8876	1.007	1.0018	0.421176	0.439256	0.139568
	11	51.3462	0.506821	1.74848	9.16161	15.82	0.148362	20.931	0.29772	0	0.0398287	100	75.4793	1.0021	1.0042	0.417807	0.439435	0.142758
	12	51.2292	0.572958	1.99445	8.90563	15.4927	0.166534	21.2787	0.309278	0	0.0505551	100	75.6166	0.9958	1.0083	0.427372	0.433002	0.139626
	13	51.2319	0.526671	1.90732	9.3184	16.3238	0.145802	20.2942	0.242011	0.00991847	0	100	75.7445	1.0047	1.0047	0.403591	0.451747	0.144662
	14	51.4385	0.435231	2.6679	7.53475	16.5497	0.0852616	20.7602	0.326175	0.00495707	0.197291	100	79.656	0.9849	1.0163	0.417947	0.463641	0.118413
	15	51.3906	0.528395	2.23598	7.42241	17.4231	0.117421	20.3845	0.202999	0	0.294548	100	80.7117	0.9992	1.0067	0.404262	0.48083	0.114908
	16	51.6304	0.501362	1.51494	8.69784	15.6982	0.174687	21.4411	0.326675	0.014804	0	100	76.2884	1.0008	1.0035	0.428173	0.436238	0.135589
	17	51.0208	0.389078	2.70568	7.93243	16.4644	0.087344	20.7829	0.293794	0.00794037	0.31563	100	78.7233	0.9922	1.0117	0.416605	0.459268	0.124127
	18	51.6114	0.412923	1.44175	8.65248	15.9687	0.177109	21.469	0.266659	0	0	100	76.6897	1.008	1.0001	0.425594	0.44051	0.133896
	19	51.1608	0.369403	2.77703	8.09983	16.1116	0.109119	20.7746	0.308336	0	0.289315	100	78.002	0.9851	1.0159	0.419539	0.452772	0.12769
	20	51.7225	0.297666	1.57962	8.74544	15.694	0.164709	21.5114	0.284767	0	0	100	76.1847	1.0026	1.0036	0.428706	0.435239	0.136055
	22	51.172	0.476486	1.56236	9.37023	15.6837	0.148656	21.1239	0.373116	0.00590685	0.0836804	100	74.8979	1.008	0.9991	0.420264	0.43421	0.145526
	23	51.229	0.437113	1.78637	8.99175	15.4436	0.171652	21.5642	0.364261	0.000997974	0.0109777	100	75.38	1.0032	1.0035	0.430645	0.429179	0.140175
	24	51.8099	0.318663	1.38219	8.71045	16.0101	0.161798	21.1728	0.333462	0.00591944	0.094711	100	76.6166	1.0034	1.0005	0.421337	0.443351	0.135311
	25	51.6367	0.366239	1.9493	8.77583	15.8922	0.116124	20.8855	0.321575	0	0.0565734	100	76.3491	0.9943	1.0091	0.418958	0.44362	0.137422
	26	51.6437	0.320997	1.79977	8.7027	16.027	0.160995	21.0109	0.32696	0.000993799	0.00596279	100	76.6514	0.9997	1.0057	0.419321	0.445099	0.13558
	27	51.6845	0.483555	1.53059	8.52216	15.9643	0.186828	21.2395	0.384646	0.00399632	0	100	76.9551	1.0003	1.0033	0.423879	0.443355	0.132767
	28	51.5169	0.30077	1.5239	9.11734	15.4696	0.174447	21.503	0.37095	0.023059	0	100	75.153	1.0047	1.0012	0.428799	0.429275	0.141926
	29	51.0583	0.437888	2.5186	8.26002	15.747	0.14563	21.259	0.364075	0	0.209468	100	77.2646	0.9898	1.0121	0.428437	0.441616	0.129947
	30	50.9475	0.66548	2.41124	9.0352	15.7586	0.108426	20.6348	0.344179	0.0159158	0.0785843	100	75.6641	0.9914	1.0126	0.415882	0.441968	0.142151
	31	50.9292	0.391549	2.99624	5.48069	17.7717	0.0715521	21.3354	0.254407	0	0.769185	100	85.2516	0.9933	1.0083	0.42379	0.491228	0.0849819
	32	51.6331	0.300651	1.85984	8.56906	16.2701	0.138839	20.69	0.3446	0.000998841	0.192776	100	77.1934	0.9968	1.0054	0.413634	0.452636	0.13373
	33	51.9284	0.301187	2.58941	4.49991	17.9152	0.062623	21.7391	0.266396	0	0.697799	100	87.6498	0.9848	1.0111	0.433206	0.496794	0.07
	34	50.3475	0.503248	2.7911	9.29179	14.9442	0.145339	21.3994	0.317372	0.000988699	0.259039	100	74.1404	0.9927	1.0122	0.432761	0.420554	0.146686
	35	50.6255	0.593399	2.17119	9.54078	15.3592	0.188584	21.1649	0.354459	0.0019747	0	100	74.1587	1.0039	1.0054	0.423416	0.427587	0.148997
	36	50.9839	0.599576	2.45399	7.49222	16.7722	0.0845174	20.8887	0.333098	0.0109375	0.380825	100	79.9625	0.9952	1.0079	0.417133	0.466075	0.116792
	37	52.1894	0.206994	1.38825	9.27492	15.5116	0.205004	20.8119	0.409012	0.00298549	0	100	74.8827	0.9916	1.0066	0.419277	0.434861	0.145862
	38	51.145	0.462177	1.89563	8.90615	15.8049	0.140749	21.2711	0.370341	0.00399289	0	100	75.9815	1.0049	1.0036	0.423585	0.437969	0.138446
	39	51.4141	0.300801	1.47403	9.14796	15.2739	0.220854	21.7307	0.380749	0.00599604	0.0509664	100	74.8515	1.0057	0.9996	0.433517	0.424021	0.142462
	40	50.6704	1.03616	2.53317	8.86858	16.0142	0.127405	20.4326	0.311545	0	0.00597211	100	76.2974	0.9911	1.0145	0.411612	0.448925	0.139464
	41	51.6443	0.323873	1.68314	8.66086	15.6565	0.182365	21.4992	0.329852	0.0139514	0.00597919	100	76.3174	0.9999	1.0046	0.429579	0.435331	0.13509
	42	51.4302	0.253268	1.57125	9.35005	15.5496	0.196655	21.2546	0.371459	0	0.0228437	100	74.7769	1.0061	1.0004	0.423468	0.431112	0.14542
	43	50.8671	0.603017	3.29663	6.66014	16.9104	0.0888552	21.1605	0.264569	0.00599024	0.142767	100	81.9043	0.9873	1.0197	0.42413	0.471662	0.104207
	44	51.5259	0.273509	1.55743	9.44885	15.0322	0.205624	21.562	0.394522	0	0	100	73.9311	1.0003	1.0032	0.432483	0.419571	0.147945
1438E 63R-2-60	1	50.2299	0.417184	3.85498	6.33126	15.6732	0.0427117	23.0762	0.18078	0.00595977	0.187733	100	81.5258	0.9904	1.0219	0.46311	0.437704	0.0991862
	2	51.5429	0.325873	2.23113	7.34614	15.1821	0.151941	22.6692	0.326873	0	0.223913	100	78.6513	0.987	1.0121	0.45768	0.426541	0.115778
	3	51.2178	0.350078	2.08141	8.84324	15.259	0.0832564	21.8192	0.322995	0	0.0230711	100	75.4657	0.9999	1.0076	0.436766	0.425049	0.138186
	4	50.9403	0.580735	3.20351	6.98576	15.9229	0.0667397	21.9484	0.214165	0	0.137464	100	80.2497	0.9836	1.0217	0.442871	0.447095	0.110035
	5	50.4247	0.573548	2.58591	9.88381	15.3909	0.104821	20.7595	0.276885	0	0	100	73.5161	1.0016	1.0102	0.416085	0.429271	0.154644
	6	50.8245	0.231574	2.64513	9.82991	15.1122	0.193644	20.8496	0.313423	0	0	100	73.266	0.994	1.0132	0.420757	0.424388	0.154855
	7	51.9405	0.255874	1.70649	7.46615	16.827	0.0866189	21.3461	0.19315	0.000995619	0.17722	100	80.0703	1.004	1.0029	0.421942	0.462853	0.115205
	8	49.894	0.630188	2.17031	13.2047	12.7411	0.384779	20.6457	0.329233	0	0	100	63.236	0.9943	1.0089	0.424079	0.364189	0.211732
	9	51.7478	0.443848	1.63412	8.54632	15.685	0.109209	21.5131	0.314601	0	0.00601148	100	76.5898	0.9982	1.0061	0.430166	0.436435	0.133399
	10	50.0096	0.328885	3.68713	8.55603	15.001	0.108622	21.9528	0.229314	0	0.126726	100	75.76	0.9912	1.0204	0.443432	0.421656	0.134912
	11	51.1349	0.256205	2.66013	9.998	15.3183	0.179143	20.1261	0.321257	0.0060048	0	100	73.1992	0.9857	1.0174	0.408676	0.432844	0.15848
	12	50.2709	0.328884	3.10221	9.44584	14.6485	0.149309	21.7205	0.295592	0.00907963	0.0292566	100	73.4359	0.994	1.0159	0.438989	0.411983	0.149028
	13	51.1811	0.278261	2.63752	8.70758	15.3451	0.177888	21.3814	0.29118	0	0	100	75.854	0.9892	1.0159	0.431664	0.431105	0.13723
	14	51.1085	0.435274	1.77481	11.6215	14.9639	0.244904	19.5348	0.289522	0.0267708	0	100	69.6539	0.9962	1.007	0.395201	0.421267	0.183533
	15	52.0355	0.395616	2.76132	5.49667	17.2053	0.065936	21.4742	0.151853	0	0.413599	100	84.8021	0.9772	1.02	0.432013	0.481665	0.0863219
	16	50.7602	0.553345	3.09375	9.07287	16.1298	0.137589	19.8915	0.287141	0	0.0737794	100	76.0144	0.985	1.0199	0.402503	0.454184	0.143313
	17	51.8109	0.526185	1.78368	9.61205	15.1603	0.32899	20.4568	0.309171	0.000990933	0.0109003	100	73.7643	0.9811	1.0138	0.417004	0.430043	0.152953
	18	51.4615	0.415728	2.37673	8.27269	16.2313	0.111658	20.7206	0.242259	0.0139573	0.15353	100	77.7659	0.9898	1.0132	0.416366	0.453868	0.129766
	19	50.5018	0.575968	2.04644	11.5023	14.5484	0.444747	19.9896	0.390656	0	0	100	69.2754	0.995	1.0067	0.40618	0.411371	0.182449
	20	52.5115	0.117422	2.0333	3.92911	16.9077	0.0551982	23.9701	0.0983531	0.0010036	0.376351	100	88.4673	0.9937	1.0088	0.474041	0.465302	0.0606572
	21	50.727	0.635527	2.66705	10.4872	15.2034	0.300055	19.6679	0.305958	0	0.00590272	100	72.1006	0.9833	1.0178	0.401295	0.43167	0.167035
	22	51.2273	0.370895	3.20944	6.46972	15.9475	0.0668009	22.4581	0.16451	0	0.0857445	100	81.4612	0.9845	1.0223	0.451869	0.446514	0.101617
	23	51.3315	0.297414	2.71513	6.15903	16.1529	0.0787851	22.8694	0.18416	0.00295444	0.208781	100	82.3795	0.9942	1.013	0.455973	0.448166	0.0958604
	24	51.472	0.457867	2.32197	8.60355	16.324	0.109769	20.3083	0.267007	0	0.135481	100	77.1809	0.9897	1.0131	0.408287	0.456689	0.135024
	25	52.3136	0.117044	1.84647	7.1074	16.5426	0.116035	21.7006	0.186665	0	0.069621	100	80.5791	0.9956	1.009	0.431691	0.457939	0.110371
1438E 64R-4-18	1	49.5751	0.682641	3.72797	8.93728	15.1627	0.085576	21.5484	0.274433	0	0.00590179	100	75.1513	0.9951	1.0198	0.434226	0.425186	0.140588
	2	50.2446	0.251459	2.94849	9.04958	15.7433	0.131153	21.3228	0.308654	0	0	100	75.6169	1.008	1.0085	0.423955	0.435587	0.140458
	3	51.4133	0.417864	1.58206	10.079	15.915	0.303353	19.9168	0.371658	0.00100448	0	100	73.7865	1.0008	1.0025	0.398884	0.443543	0.157574
	4	50.7433	0.370411	2.2525	10.3004	15.7505	0.184204	20.0823	0.299332	0.0170189	0	100	73.1604	1.0046	1.0058	0.401318	0.437998	0.160684
	5	50.0179	0.624165	2.89848	8.68148	15.3878	0.127625	21.9584	0.2722	0.00897362	0.0229326	100	75.9597	1.006	1.0092	0.437869	0.426993	0.135138
	6	49.9492	0.535249	2.94689	9.30146	15.314	0.163995	21.3727	0.33604	0	0.0804886	100	74.5866	1.0034	1.0093	0.427934	0.426685	0.145382
	7	49.4116	0.531222	3.72651	8.31253	15.2075	0.0994797	22.3899	0.270585	0	0.0507347	100	76.5327	1.0038	1.0149	0.447431	0.422896	0.129673
	8	49.7032	0.756187	3.09412	9.58861	15.2555	0.169473	21.0771	0.344893	0.0109018	0	100	73.9324	1.0012	1.012	0.423309	0.426361	0.150329
	9	49.9122	0.666369	3.31301	8.27012	15.1064	0.115028	22.3541	0.235014	0	0.0277654	100	76.5048	0.9984	1.0157	0.448595	0.421851	0.129554
	10	50.1476	0.504965	3.13416	9.01383	15.134	0.150098	21.63	0.285285	0	0	100	74.9562	0.9971	1.0149	0.43498	0.423517	0.141502
	11	50.6643	0.366686	2.61649	9.08269	15.4962	0.153034	21.2857	0.3011	0	0.0337868	100	75.2561	1.0002	1.01	0.426227	0.431799	0.141974
	12	49.8726	0.982579	3.42763	8.62707	15.2047	0.123938	21.5116	0.237961	0.000991503	0.0109065	100	75.8558	0.9889	1.0211	0.435419	0.428267	0.136314
	13	49.5774	0.626861	4.0751	8.0355	15.1775	0.0804959	22.1072	0.298841	0.00402479	0.0171054	100	77.1012	0.99	1.0239	0.446607	0.426673	0.12672
	14	50.201	0.554889	3.44431	7.9794	15.2779	0.107978	22.1386	0.281944	0.0139972	0	100	77.3405	0.9915	1.0197	0.446093	0.428394	0.125513
	15	49.8656	0.298733	3.47626	8.55373	15.3838	0.121485	21.9898	0.301721	0.00298733	0.00597467	100	76.2246	1.0036	1.0136	0.439141	0.427513	0.133346
	16	50.0637	0.797922	3.29044	8.29227	15.1348	0.104678	22.0396	0.276508	0	0	100	76.4906	0.992	1.0187	0.444582	0.424843	0.130576
	17	50.3334	0.683623	2.22302	11.3091	15.8497	0.204987	18.9773	0.359225	0.00398034	0.0557247	100	71.4151	1.0039	1.0049	0.380601	0.442344	0.177055
	18	49.8456	0.439195	3.65695	8.51416	15.0459	0.0842291	22.1402	0.256698	0	0.0170464	100	75.9048	0.9962	1.0189	0.445263	0.421072	0.133665
	19	50.6311	0.591915	2.17036	10.6218	15.715	0.191356	19.79	0.288522	0	0	100	72.508	1.0037	1.006	0.396196	0.437806	0.165998
	20	50.0666	0.731814	2.69757	9.76912	15.3711	0.181959	20.8925	0.288351	0.000994313	0	100	73.7178	1.0032	1.0093	0.418617	0.428582	0.1528
	21	49.5393	0.761251	3.55517	8.41278	15.157	0.0930307	22.2263	0.255084	0	0	100	76.2566	1.0003	1.0164	0.445547	0.422807	0.131646
	22	49.3395	0.843731	3.38879	9.22658	15.0406	0.157457	21.6439	0.312933	0.00198059	0.0445633	100	74.3979	1.0015	1.0134	0.434823	0.42048	0.144697
	23	50.8375	0.458174	2.58045	8.87787	15.4252	0.170576	21.3487	0.290574	0.0109089	0	100	75.5937	0.9953	1.0126	0.429171	0.431511	0.139318
	24	50.9205	0.573559	2.25149	9.40755	15.3936	0.190855	20.9195	0.333996	0.00894632	0	100	74.4698	0.9956	1.0101	0.421047	0.431145	0.147808
	25	50.6855	0.278018	2.69486	9.52687	15.1635	0.164602	21.1685	0.318164	0	0	100	73.9402	0.997	1.0122	0.425871	0.424513	0.149617
1438E 65R-2-60	2	50.5686	0.718207	3.28985	10.3581	14.9846	0.147066	19.5669	0.336439	0.0302191	0	100	72.0581	0.9715	1.028	0.403401	0.429898	0.166701
	3	49.627	0.185745	4.08739	7.94687	14.717	0.076306	23.0956	0.244982	0.0190765	0	100	76.7512	0.9974	1.0208	0.463965	0.411413	0.124622
	4	51.5824	0.523991	1.70694	10.4322	16.1534	0.270927	19.0741	0.256041	0	0	100	73.4061	0.994	1.0079	0.383814	0.452318	0.163868
	5	53.3418	0.11627	1.722	5.79344	18.5059	0.0511186	20.252	0.100233	0.00601395	0.111258	100	85.0618	0.9878	1.012	0.400818	0.509675	0.0895071
	6	49.7648	0.601065	3.18022	10.1809	14.9915	0.140718	20.8644	0.267364	0.00904614	0	100	72.4133	1	1.014	0.420032	0.419974	0.159994
Standards		SiO2	TiO2	Al2O3	FeO	MgO	MnO	CaO	Na2O	K2O	Cr2O3	Total
	Enstatite-1	54.676	0.114	4.691	6.837	32.705	0.06	0.787	0.124	0.007	0.474	100.475
	Enstatite-2	54.239	0	4.719	6.638	33.565	0.061	0.824	0.138	0.02	0.243	100.447
	Enstatite-3	53.897	0.159	4.697	6.791	31.963	0.07	0.82	0.213	0.073	0.328	99.011
	Enstatite-4	53.766	0.137	4.536	6.874	31.883	0.077	0.746	0.15	0.043	0.305	98.517
	Enstatite-5	54.176	0.137	4.164	6.947	32.018	0.057	0.749	0.129	0.031	0.289	98.697
	Enstatite-6	54.91	0.046	4.422	6.742	33.735	0.068	0.895	0.098	0	0.441	101.357
	Enstatite-7	54.722	0	4.556	6.619	33.343	0.074	0.79	0.134	0	0.333	100.571
	Enstatite-8	54.161	0	4.685	7.195	33.375	0.068	0.815	0.105	0.008	0.237	100.649
	Enstatite-9	54.663	0.136	4.546	6.775	31.844	0.079	0.762	0.202	0.052	0.328	99.387
	Enstatite-10	54.203	0.113	4.441	6.955	31.864	0.062	0.734	0.158	0.026	0.283	98.839
	Enstatite-11	54.723	0.249	4.436	6.611	32.402	0.063	0.817	0.194	0.055	0.463	100.013
